# Supplementary material
Source: PubMed Central journal article supplement (PMC3507617)
Supplement: NIHMS415990-supplement-supp1.pdf [file NIHMS415990-supplement-supp1.pdf]

SNP associations with fasting glucose

SNPs from the Dupuis et al. meta-analysis<sup>21</sup>

| SNP        | chromosome | position  | near gene* | minor allele | major allele |
|------------|------------|-----------|------------|--------------|--------------|
| rs10830963 | 11         | 92348358  | MTNR1B     | G            | C            |
| rs4607517  | 7          | 44202193  | GCKR       | G            | A            |
| rs560887   | 2          | 169471394 | G6PC2      | T            | C            |
| rs2191349  | 7          | 15030834  | DGKB       | T            | G            |
| rs780094   | 2          | 27594741  | GCKR       | T            | C            |
| rs11708067 | 3          | 124548468 | ADCY5      | G            | A            |
| rs7944584  | 11         | 47292896  | MADD       | T            | A            |
| rs10885122 | 10         | 113032083 | ADRA2A     | T            | G            |
| rs174550   | 11         | 61328054  | FADS1      | T            | C            |
| rs11605924 | 11         | 45823667  | CRF2       | C            | A            |
| rs7034200  | 9          | 4279050   | GLIS3      | C            | A            |
| rs340874   | 1          | 212225879 | PROX1      | T            | C            |
| rs11071657 | 15         | 60221254  | C2CD4B     | G            | A            |
| rs11558471 | 8          | 118254914 | SLC30A8    | G            | A            |
| rs4506565  | 10         | 114746031 | TCF7L2     | T            | A            |

SNPs identified in exploratory analysis

| SNP       | chromosome | position  | near gene* | minor allele | major allele |
|-----------|------------|-----------|------------|--------------|--------------|
| rs3781637 | 11         | 92353418  | MTNR1B     | T            | C            |
| rs2268569 | 7          | 44193545  | GCKR       | T            | G            |
| rs1798684 | 7          | 44193593  | GCKR       | T            | C            |
| rs3821117 | 2          | 169472050 | G6PC2      | T            | C            |
| rs2323228 | 2          | 169472792 | G6PC2      | G            | C            |

SNP associations with fasting insulin

SNPs from the Dupuis et al. meta-analysis<sup>21</sup>

| SNP      | chromosome | position  | near gene* | minor allele | major allele |
|----------|------------|-----------|------------|--------------|--------------|
| rs780094 | 2          | 27594741  | GCKR       | T            | C            |
| rs35767  | 12         | 101399699 | NA         | G            | A            |

\*according to Dupuis et al. meta-analysis

MESA whites

| beta     | se      | p-value  | MAF     | imputation quality |
|----------|---------|----------|---------|--------------------|
| 1.4251   | 0.31977 | 8.32E-06 | 0.26752 | NA                 |
| -1.1885  | 0.36075 | 0.000986 | 0.17213 | 0.99               |
| -1.6435  | 0.31486 | 1.79E-07 | 0.27665 | NA                 |
| 0.51611  | 0.28408 | 0.069252 | 0.46474 | 0.965109           |
| -0.8728  | 0.33228 | 0.001907 | 0.42907 | NA                 |
| -0.8601  | 0.33228 | 0.009641 | 0.22831 | NA                 |
| 0.29346  | 0.31106 | 0.34546  | 0.29396 | NA                 |
| -0.25776 | 0.44445 | 0.56195  | 0.11723 | 0.956971           |
| 0.13987  | 0.30062 | 0.64173  | 0.3265  | 0.996297           |
| -0.27123 | 0.28209 | 0.3363   | 0.47557 | 0.999              |
| -0.2384  | 0.2752  | 0.38635  | 0.48901 | 0.999              |
| -0.3135  | 0.28832 | 0.2769   | 0.46733 | 0.937701           |
| -0.03881 | 0.31713 | 0.90261  | 0.36463 | 0.861359           |
| -0.55006 | 0.31394 | 0.079755 | 0.29944 | 0.965442           |
| 0.36691  | 0.29887 | 0.21958  | 0.31211 | NA                 |

MESA chinese

| beta     | se      | p-value  | MAF      | imputation quality |
|----------|---------|----------|----------|--------------------|
| 1.2259   | 0.56403 | 0.02974  | 0.44463  | NA                 |
| -1.1038  | 0.76534 | 0.14923  | 0.18046  | 0.914326           |
| 0.51204  | 1.7944  | 0.77537  | 0.025578 | NA                 |
| 1.6506   | 0.61537 | 0.007312 | 0.30761  | 0.940341           |
| -1.3239  | 0.57247 | 0.020748 | 0.47112  | NA                 |
| 3.7659   | 1.8164  | 0.038141 | 0.023102 | NA                 |
| 0.95286  | 1.1557  | 0.40967  | 0.062562 | 0.976117           |
| 0.010243 | 0.53271 | 0.98466  | 0.40431  | 0.999              |
| 0.9186   | 0.65713 | 0.16215  | 0.22993  | 0.999              |
| 0.22304  | 0.56445 | 0.69273  | 0.45813  | 0.994991           |
| -0.4953  | 0.60293 | 0.41137  | 0.39196  | 0.905710           |
| 0.071071 | 0.66213 | 0.91452  | 0.3481   | 0.749295           |
| -1.4403  | 0.57666 | 0.0125   | 0.47113  | 0.964106           |
| 0.5772   | 1.7189  | 0.73702  | 0.028099 | NA                 |

MESA african american

| beta     | se      | p-value  | MAF      | imputation quality |
|----------|---------|----------|----------|--------------------|
| 1.6539   | 0.73304 | 0.024054 | 0.082101 | NA                 |
| -1.0658  | 0.72642 | 0.14233  | 0.10865  | 0.841175           |
| -0.12929 | 0.81546 | 0.87403  | 0.067135 | NA                 |
| -0.28064 | 0.43781 | 0.52151  | 0.41413  | 0.946354           |
| -0.61203 | 0.52363 | 0.24247  | 0.17988  | NA                 |
| -1.1428  | 0.91123 | 0.20982  | 0.052448 | NA                 |
| -0.23448 | 0.44248 | 0.59616  | 0.34752  | 0.964563           |
| 0.44217  | 0.68247 | 0.51705  | 0.098265 | 0.999              |
| -1.0398  | 0.56434 | 0.065404 | 0.15206  | 0.999              |
| -0.34237 | 0.43489 | 0.43112  | 0.37129  | 0.983178           |
| -0.92723 | 0.53433 | 0.069689 | 0.18361  | 0.938669           |
| 1.4729   | 0.66481 | 0.026723 | 0.15626  | 0.699691           |
| -0.54873 | 0.70594 | 0.43698  | 0.099487 | 0.914869           |
| -0.06021 | 0.41646 | 0.88506  | 0.42935  | NA                 |

MESA hispanic

| beta     | se      | p-value  | MAF     | imputation quality |
|----------|---------|----------|---------|--------------------|
| 1.3156   | 0.55268 | 0.017291 | 0.19577 | NA                 |
| -1.1937  | 0.56046 | 0.033182 | 0.24121 | 0.861273           |
| -1.5992  | 0.60976 | 0.008722 | 0.14427 | NA                 |
| -0.19442 | 0.43778 | 0.65697  | 0.48647 | 0.999              |
| -1.1426  | 0.46362 | 0.01372  | 0.34274 | NA                 |
| -1.1351  | 0.47901 | 0.017808 | 0.27912 | NA                 |
| 0.05659  | 0.61082 | 0.92619  | 0.15022 | NA                 |
| 0.14673  | 0.53333 | 0.78323  | 0.19906 | 0.999              |
| -0.01093 | 0.41272 | 0.97887  | 0.46574 | 0.999              |
| -0.64239 | 0.43393 | 0.13877  | 0.47639 | 0.999              |
| -0.52331 | 0.4394  | 0.23366  | 0.46099 | 0.991228           |
| -0.6365  | 0.44914 | 0.15644  | 0.37307 | 0.999              |
| -0.286   | 0.45645 | 0.53095  | 0.45776 | 0.905579           |
| -0.66734 | 0.5275  | 0.20583  | 0.25075 | 0.921595           |
| 0.01251  | 0.48049 | 0.97923  | 0.28456 | NA                 |

meta analysis non-white (chinese, hispanic, african american)

| MAF  | beta   | se   | p-value  | heterogeneity p-value |
|------|--------|------|----------|-----------------------|
| 0.27 | 1.36   | 0.34 | 9.40E-05 | 0.89                  |
| 0.19 | -1.13  | 0.39 | 0.003    | 0.17                  |
| 0.11 | -0.87  | 0.47 | 0.06     | 0.98                  |
| 0.42 | 0.14   | 0.28 | 0.6      | 0.02                  |
| 0.32 | -1.02  | 0.3  | 0.0006   | 0.62                  |
| 0.28 | -1.13  | 0.47 | 0.02     | 0.99                  |
| 0.12 | -0.02  | 0.49 | 0.97     | 0.05                  |
| 0.27 | 0.0034 | 0.33 | 0.99     | 0.6                   |
| 0.38 | 0.08   | 0.29 | 0.78     | 0.84                  |
| 0.33 | -0.43  | 0.3  | 0.17     | 0.06                  |
| 0.43 | -0.28  | 0.27 | 0.3      | 0.57                  |
| 0.32 | -0.1   | 0.3  | 0.74     | 0.05                  |
| 0.36 | 0.23   | 0.33 | 0.49     | 0.09                  |
| 0.29 | -0.91  | 0.34 | 0.007    | 0.52                  |
| 0.36 | -0.009 | 0.31 | 0.98     | 0.94                  |

meta-analysis all four groups

| MAF   | beta   | se   | p-value    | heterogeneity p-value |
|-------|--------|------|------------|-----------------------|
| 0.27  | 1.38   | 0.19 | 1.29 E -12 | 0.97                  |
| 0.19  | -1.15  | 0.22 | 1.0 E -7   | 0.15                  |
| 0.2   | -1.29  | 0.23 | 2.1 E -6   | 0.99                  |
| 0.44  | 0.33   | 0.2  | 0.101      | 0.04                  |
| 0.38  | -0.94  | 0.27 | 3.9 E -6   | 0.78                  |
| 0.24  | -0.94  | 0.27 | 0.0005     | 0.64                  |
| 0.24  | 0.2    | 0.26 | 0.44       | 0.1                   |
| 0.22  | -0.09  | 0.26 | 0.74       | 0.74                  |
| 0.35  | 0.11   | 0.21 | 0.61       | 0.95                  |
| 0.41  | -0.34  | 0.21 | 0.1        | 0.12                  |
| 0.46  | -0.26  | 0.19 | 0.18       | 0.77                  |
| 0.4   | -0.21  | 0.21 | 0.31       | 0.1                   |
| 0.36  | -0.09  | 0.23 | 0.69       | 0.16                  |
| 0.3   | -0.715 | 0.23 | 0.002      | 0.6                   |
| 0.333 | 0.19   | 0.22 | 0.39       | 0.83                  |

|          |         |          |          |          |
|----------|---------|----------|----------|----------|
| 0.007028 | 0.90002 | 0.99377  | 0.055755 | 0.489549 |
| 1.2434   | 0.36    | 0.000553 | 0.17137  | NA       |
| -0.30788 | 0.47938 | 0.5207   | 0.094452 | NA       |
| 0.22892  | 0.47542 | 0.63016  | 0.095332 | NA       |

|         |         |         |          |          |
|---------|---------|---------|----------|----------|
| 2.4421  | 1.1833  | 0.03904 | 0.12716  | 0.511099 |
| 1.2413  | 1.1231  | 0.26906 | 0.14696  | 0.460367 |
| 1.1258  | 0.72346 | 0.11969 | 0.19059  | NA       |
| -2.3158 | 1.8831  | 0.21879 | 0.023102 | NA       |
| 2.1144  | 1.916   | 0.2698  | 0.022277 | NA       |

|          |         |          |          |          |
|----------|---------|----------|----------|----------|
| 0.29951  | 1.6619  | 0.85697  | 0.035037 | 0.447773 |
| 1.7354   | 0.63785 | 0.006516 | 0.2133   | 0.626280 |
| 0.79083  | 0.55159 | 0.15165  | 0.16356  | NA       |
| 0.84955  | 0.45677 | 0.062897 | 0.27661  | NA       |
| -0.76274 | 0.40922 | 0.062339 | 0.49339  | NA       |

|         |         |          |          |          |
|---------|---------|----------|----------|----------|
| 2.8476  | 1.4304  | 0.046506 | 0.044637 | 0.488252 |
| -2.1844 | 1.0795  | 0.043013 | 0.11495  | 0.442421 |
| 1.5453  | 0.54707 | 0.004733 | 0.20807  | NA       |
| -1.1822 | 0.588   | 0.044378 | 0.15502  | NA       |
| 0.69964 | 0.55092 | 0.2041   | 0.18772  | NA       |

|      |         |      |        |       |
|------|---------|------|--------|-------|
| 0.08 | 2.07    | 0.8  | 0.01   | 0.47  |
| 0.18 | 0.82    | 0.49 | 0.1    | 0.006 |
| 0.19 | 1.16    | 0.34 | 0.0007 | 0.62  |
| 0.22 | -0.0001 | 0.35 | 0.99   | 0.01  |
| 0.38 | -0.18   | 0.32 | 0.6    | 0.05  |

|      |       |      |          |      |
|------|-------|------|----------|------|
| 0.08 | 2.07  | 0.8  | 0.009    | 0.47 |
| 0.15 | 0.63  | 0.43 | 0.14     | 0.01 |
| 0.18 | 1.2   | 0.24 | 1.3 E -6 | 0.81 |
| 0.18 | -0.11 | 0.38 | 0.7      | 0.03 |
| 0.29 | -0.05 | 0.27 | 0.86     | 0.09 |

|          |          |          |         |          |
|----------|----------|----------|---------|----------|
| -0.04173 | 0.017873 | 0.019567 | 0.42901 | NA       |
| -0.02146 | 0.024805 | 0.38687  | 0.16166 | 0.947775 |

|          |          |         |         |          |
|----------|----------|---------|---------|----------|
| -0.04745 | 0.033454 | 0.15607 | 0.47107 | NA       |
| 0.032749 | 0.034719 | 0.34556 | 0.36673 | 0.961035 |

|          |          |          |         |          |
|----------|----------|----------|---------|----------|
| -0.0712  | 0.03038  | 0.019095 | 0.17938 | NA       |
| 0.006509 | 0.024828 | 0.79318  | 0.4209  | 0.926361 |

|          |          |          |         |          |
|----------|----------|----------|---------|----------|
| -0.06896 | 0.026565 | 0.009434 | 0.34274 | NA       |
| 0.024801 | 0.029554 | 0.40137  | 0.24844 | 0.937273 |

|      |       |      |        |      |
|------|-------|------|--------|------|
| 0.32 | -0.06 | 0.02 | 0.0002 | 0.85 |
| 0.36 | 0.02  | 0.02 | 0.27   | 0.8  |

|      |       |      |          |      |
|------|-------|------|----------|------|
| 0.37 | -0.05 | 0.01 | 1.6 E -5 | 0.77 |
| 0.3  | 0.006 | 0.01 | 0.67     | 0.53 |
